# Supplementary material for: Sn1−xSe thin films with low thermal conductivity: role of stoichiometric deviation in thermal transport
Source: Royal Society of Chemistry journal article supplement (doi:10.1039/c8tc03051k), 2018-01-01
Supplement: c8tc03051k1.pdf [file c8tc03051k1.pdf]

Supplementary information

**Sn<sub>1-x</sub>Se thin films with low thermal conductivity: role of stoichiometry deviation in thermal transport**

Giuk Jeong,<sup>a</sup> Yoon Hwan Jaung,<sup>b</sup> Je kyung Kim,<sup>a</sup> Jae Yong Song,<sup>\*b</sup> and Byungha Shin<sup>\*1</sup>

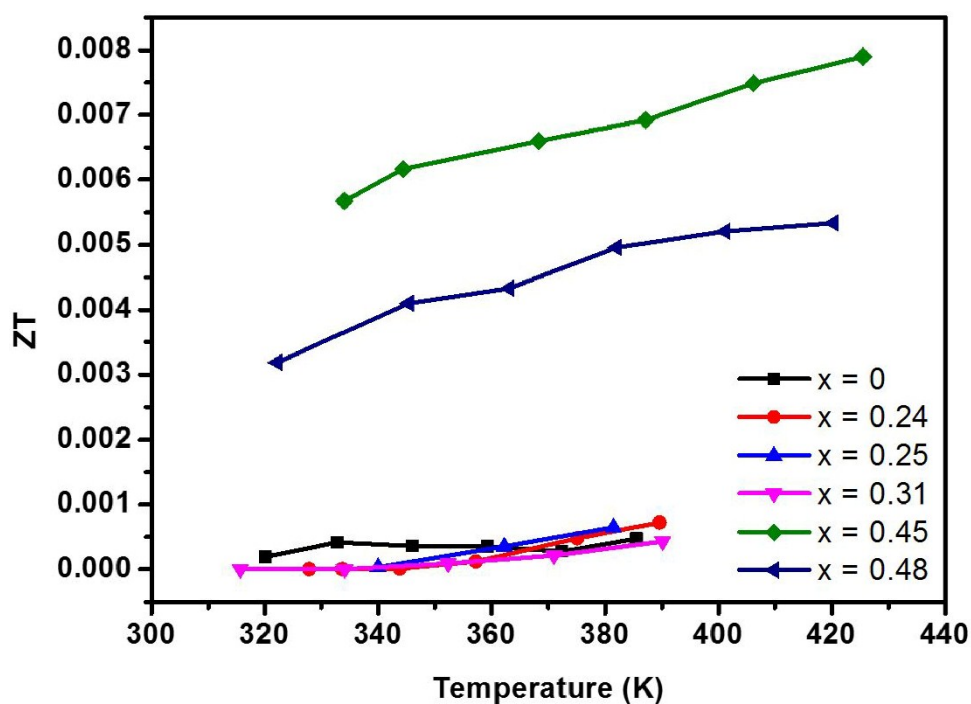

Fig. S1. ZT values of Sn<sub>1-x</sub>Se thin films

<sup>\*a</sup> Dept. of Materials Science and Engineering, Korea Advanced Institute of Science and Technology, 291 Daehak-ro, Yuseong-gu, Daejeon, 34141, Republic of Korea, E-mail: [byungha@kaist.ac.kr](mailto:byungha@kaist.ac.kr)

<sup>\*b</sup> Korea Research Institute of Standards and Science, 267 Gajeong-ro, Yuseong-gu, Daejeon, 34113, Republic of Korea, E-mail: [jysong@kriss.re.kr](mailto:jysong@kriss.re.kr)

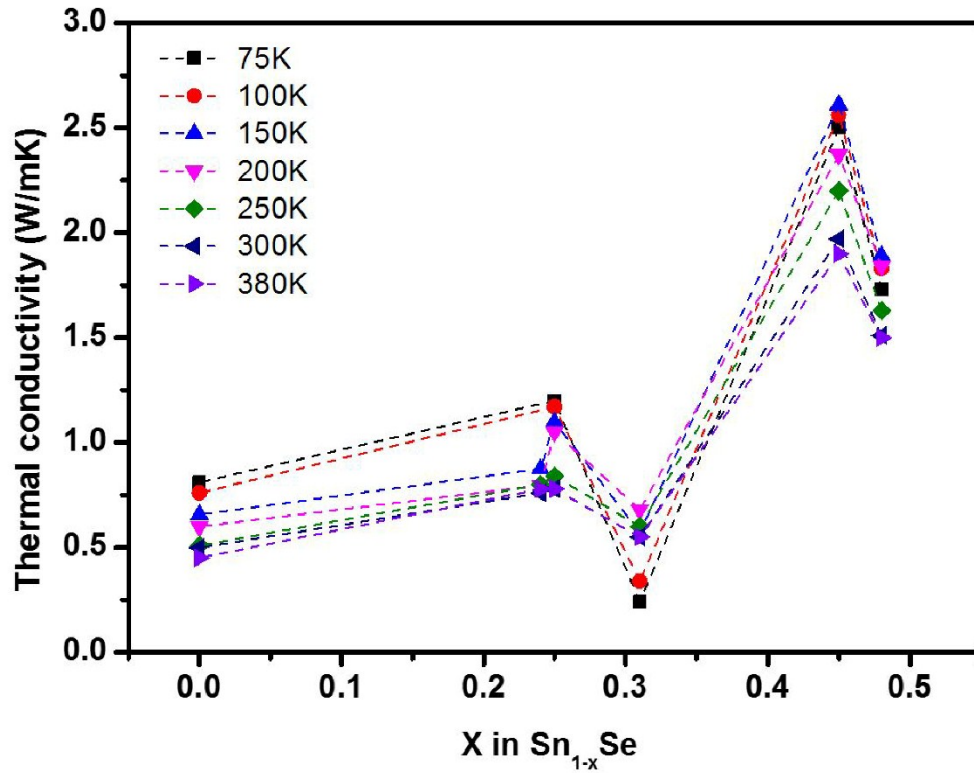

Fig. S2. Composition dependence of thermal conductivity of  $\text{Sn}_{1-x}\text{Se}$  thin films.

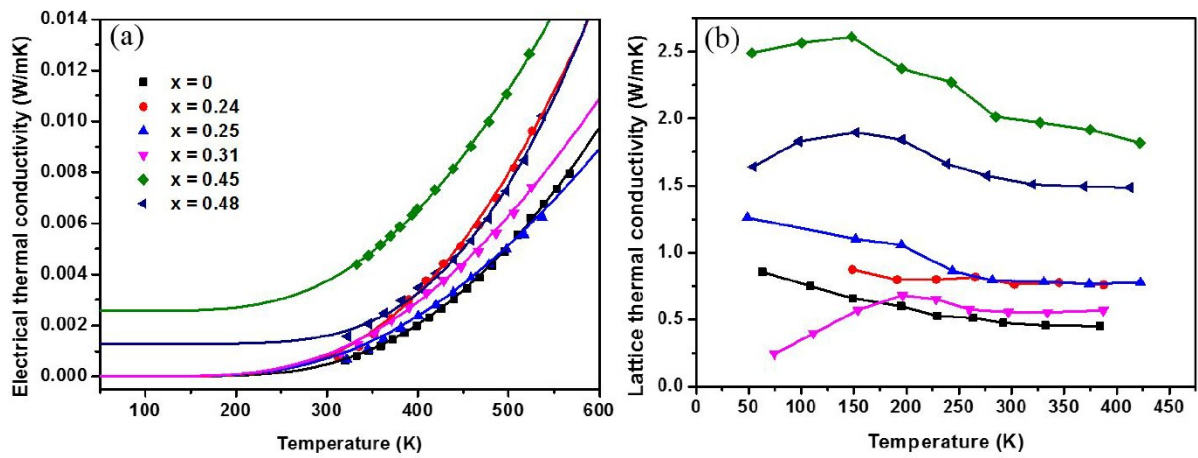

Fig. S3. Temperature dependence of thermal conductivity of  $\text{Sn}_{1-x}\text{Se}$  thin films: (a) electrical thermal conductivity, (b) lattice thermal conductivity.

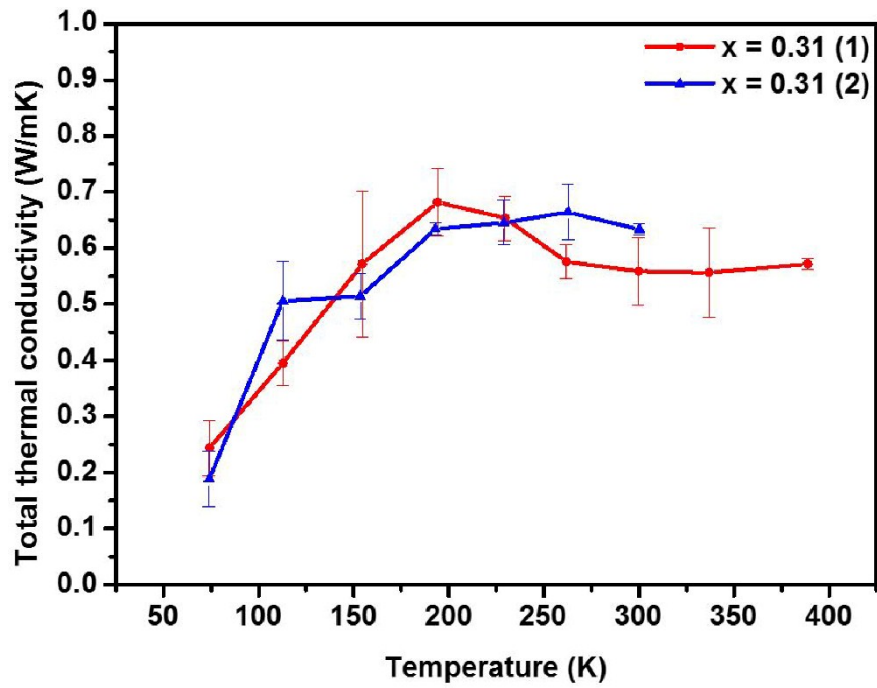

**Fig. S4.** Temperature dependence of total thermal conductivity of  $\text{Sn}_{1-x}\text{Se}$  thin films with  $x=0.31$ . (1) and (2) are from two different flakes lifted from a same thin film.
